# Supplementary material for: Moisture sorption of cellulose-based porous media containing co-solvents and its impact on pore-fiber transport rates of co-solvent solutions
Source: Royal Society of Chemistry journal article supplement (doi:10.1039/d5sm00847f), 2025-12-23
Supplement: d5sm00847f1.pdf [file d5sm00847f1.pdf]

## Supplementary information for manuscript:

# Moisture sorption of cellulose-based porous media containing co-solvents and its impact on pore-fiber transport rates of co-solvent solutions

Sajjad Karimnejad and Anton A. Darhuber

*Fluids & Flows Group, Department of Applied Physics, Eindhoven University of Technology, Postbus 513, 5600MB Eindhoven, The Netherlands*

(Dated: 22 December 2025)

## I. MATERIAL PROPERTIES OF CO-SOLVENTS

Table S1 lists the Sigma-Aldrich product number, molecular weight (MW), viscosity ( $\mu_{cs}$ ), and saturated vapor pressure ( $p_{cs,vap}$ ) of the pure co-solvents used in this study.<sup>1-4</sup>

## II. VALUES OF THE VAN LAAR COEFFICIENTS

Experimental data of water activity as a function of composition of aqueous co-solvent solutions are available for EGO for a large range of molecular weights.<sup>5-7</sup> However, unfortunately we were unable to find literature data for PEG300. Therefore, we resorted to interpolation of the numerical values of the Van Laar fit parameters  $A_{12}$  and  $A_{21}$  obtained for MW values above and below 300. The symbols in Fig. S1 represent the available literature data for  $A_{12}$ . The solid line is a linear fit, which reproduces the data very well. Interestingly,  $A_{21}$  is essentially constant, whereas  $A_{12}$  shows a considerable dependence on MW. The interpolated values for PEG300 were found as  $A_{12} = -4.43$  and  $A_{21} = -0.5$ .

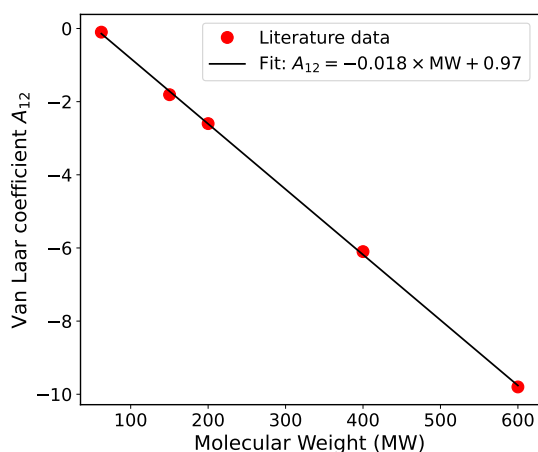

FIG. S1. Numerical values of the Van Laar fit parameter  $A_{12}$  for EGOs as a function of molecular weight  $MW$  (red circles). The black solid line is a linear fit.

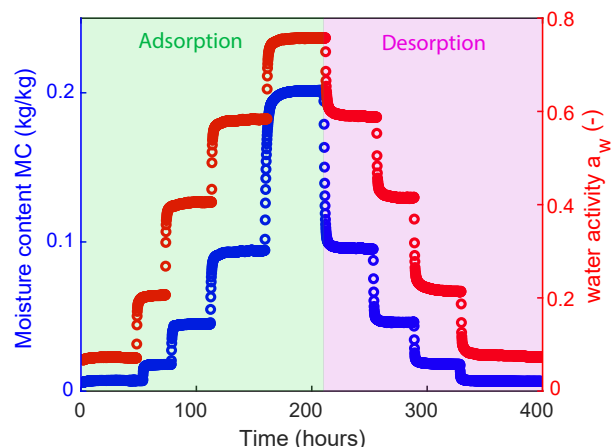

FIG. S2. Water activity  $a_w$  (red circles) and moisture content  $MC$  of paper C (blue circles) as a function of time. The co-solvent content (PEG300) was  $\theta_{cs} = 0.44$  g/g.

## III. TYPICAL EXPERIMENTAL DATA

Figure S2 shows a typical experimental data of the water activity  $a_w$  in the measurement chamber and the corresponding moisture content  $MC$  of paper C as a function of time.

## IV. EQUILIBRIUM MOISTURE SORPTION OF PAPERS B AND C

In Fig. S3, equilibrium moisture sorption isotherms of untreated and co-solvent-infused papers B and C are shown. The filled and open symbols represent the experimental data for adsorption and desorption, respectively. The solid and dashed green lines are corresponding GAB fits for untreated, co-solvent-free papers. The values of the GAB fit parameters for paper B and C are presented in Tab. S2. The solid and dashed red lines represent Eq. (10) in the main manuscript, i.e. the theoretical model according to scenario (1), where we substituted the adsorption/desorption GAB fits of Tab. S2 for  $(MC)_{\text{paper}}$ .

Hysteresis loops between the adsorption and desorption branches are observed for all untreated paper types. Paper C exhibits greater hysteresis than papers A and B. This is consistent with previous observations and was

TABLE S1. Sigma-Aldrich product number, molecular weight  $MW$ , viscosity  $\mu_{cs}$ , and saturated vapor pressure  $p_{cs,vap}$  of the pure co-solvents used in this study at 20°C.<sup>1-4</sup>

| Co-solvent                   | Product# | $MW$  | $\mu_{cs}$ [mPa s] | $p_{cs,vap}$ [mPa] |
|------------------------------|----------|-------|--------------------|--------------------|
| Glycerol                     | 449770   | 92.1  | 1206               | $13 \pm 5$         |
| Ethylene glycol (EG)         | 324558   | 62.1  | 19.8               | 7728               |
| Tetra(ethylene glycol) (TEG) | 110175   | 194.2 | 58.3               | $12 \pm 4$         |
| PEG300                       | 90878    | 300   | 91.0               | $\leq 0.014$       |

TABLE S2. Adsorption and desorption GAB fit parameter values for untreated papers B and C.

| Paper |      | $M_0$ | $C$ | $K$  |
|-------|------|-------|-----|------|
| B     | Ads. | 0.026 | 6.4 | 0.90 |
|       | Des. | 0.032 | 6.5 | 0.83 |
| C     | Ads. | 0.025 | 3.9 | 0.86 |
|       | Des. | 0.039 | 3.8 | 0.71 |

attributed to its high crystallinity and low amorphous content, which limit structural relaxation during moisture cycling.<sup>8</sup> In Fig. S3(b), data of two consecutive adsorption/desorption loops (represented by the green and blue symbols) are shown for untreated paper C, which illustrates that repeated cycling decreases the hysteresis.

## V. THICKNESS EXPANSION STRAIN

### A. Hygroexpansion strain of untreated and co-solvent-infused paper A

Figure S4(a) shows the thickness hygroexpansion strain  $\epsilon_{TD}$  [defined in Eq. (11) in the main manuscript] of untreated paper A as a function of its moisture content  $MC$ . Figure S4(b) illustrates the increment of the thickness hygroexpansion strain [defined by Eq. (12) in the main manuscript] of paper A with an initial PEG300 content of  $\theta_{cs,ini} = 0.21$  g/g as a function of water activity  $a_w$ .

Chen *et al.* found that there is no hysteresis present in the expansion strain of amorphous cellulose, if it is plotted as a function of the moisture content.<sup>9</sup> In contrast, Fig. S4(a) reveals that considerable hysteresis is observed in the correlation between  $\epsilon_{TD}$  and  $MC$  for paper A. Figure S4(b) illustrates that – similarly to the removal of moisture sorption hysteresis in Fig. 6 – the presence of 0.21 g/g PEG300 suppresses the considerable hygroexpansion strain hysteresis seen with untreated paper A in Fig. 5.

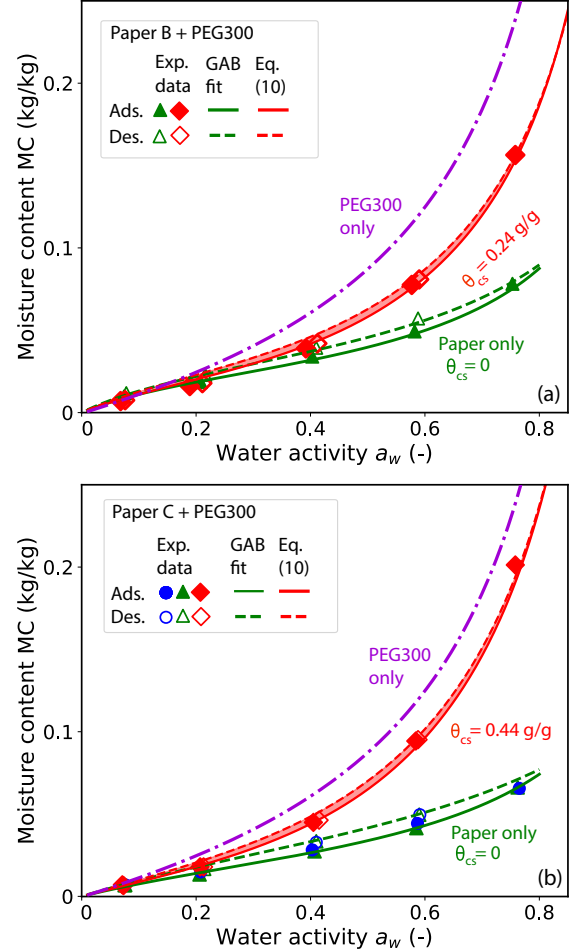

FIG. S3. Equilibrium moisture sorption isotherms for (a) paper B and (b) paper C. The filled and open symbols represent the experimental data for adsorption and desorption, respectively. The green solid and dashed lines are corresponding GAB fits for untreated, co-solvent-free papers. The purple line represents the moisture content of PEG300. The solid and dashed red lines represent Eq. (10) in the main manuscript, i.e. the theoretical model according to scenario (1) for co-solvent-infused papers, where we substituted the adsorption/desorption GAB fits of Tab. S2 for  $(MC)_{paper}$ .

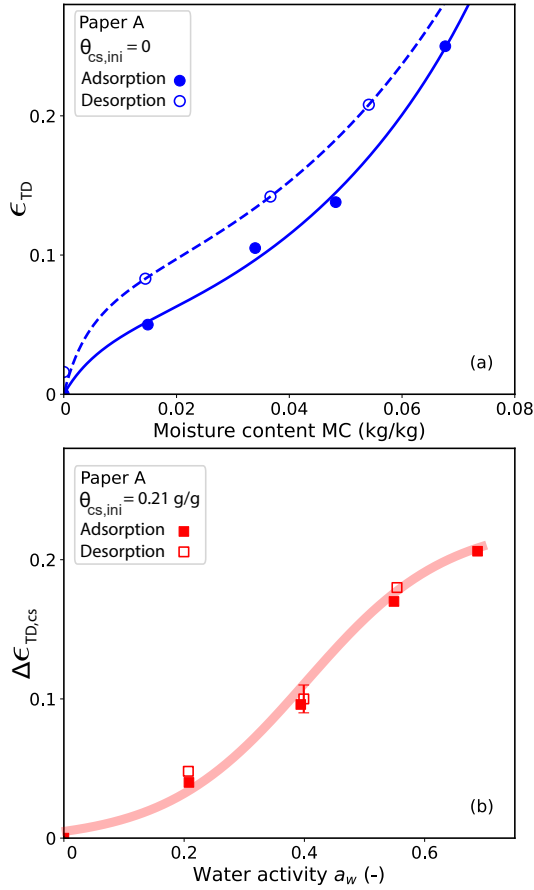

FIG. S4. (a) Thickness hygroexpansion strain  $\epsilon_{TD}$  of untreated paper A as a function of moisture content  $MC$ . (b) Increment of the thickness expansion strain  $\Delta\epsilon_{TD,cs}$  of paper A with initial PEG300 content  $\theta_{cs,ini} = 0.21$  g/g as a function of water activity  $a_w$ . Filled and open symbols correspond to experimental data obtained for increasing and decreasing water activities, respectively. All lines are guides to the eye.

### B. Increment of thickness expansion strain after model ink deposition

Figure S5 shows the maximum increment of the thickness expansion strain  $\Delta\epsilon_{TD,max}$  after deposition of a droplet of a 60 wt% TEG solution on paper A as a function of initial water activity  $a_w$ . Interestingly,  $\Delta\epsilon_{TD,max}$  is essentially independent of  $a_w$ , except for the data-point at zero ambient humidity.

## VI. THE BERENS & HOPFENBERG MODEL

The Berens & Hopfenberg model<sup>10</sup> considers solvent uptake by polymer layers. It accounts for both solvent diffusion and structural relaxations of the polymers chains, e.g. as a consequence of solvent-induced plasticization.<sup>10,11</sup> In the case of paper and water or co-solvents, liquid uptake is accompanied by substantial

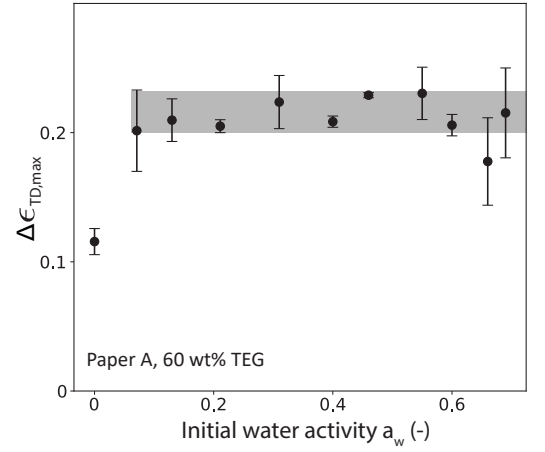

FIG. S5. Maximum increment of the thickness expansion strain  $\Delta\epsilon_{TD,max}$  after deposition of a droplet of a 60 wt% TEG solution on paper A as a function of initial water activity  $a_w$ .

swelling. Thus, monitoring changes of the paper thickness provides information about the dynamics of pore-fiber transport.

The increment of the time-dependent expansion strain  $\Delta\epsilon_{TD}(t)$  is modeled as the superposition of a Fickian diffusion term and a relaxation component

$$\Delta\epsilon_{TD}(t) = \Delta\epsilon_{diff}(t) + \Delta\epsilon_{relax}(t). \quad (1)$$

### Diffusion Term

The strain contribution as a consequence of solvent diffusion is given by the classical (truncated) Fourier series solution<sup>11</sup>

$$\Delta\epsilon_{diff}(t) = A_d \left[ 1 - \frac{8}{\pi^2} \sum_{n=0}^N \frac{\exp(-(2n+1)^2 k_d t)}{(2n+1)^2} \right], \quad (2)$$

where  $A_d$  is the strain amplitude and  $k_d \equiv 1/t_d$  the diffusion rate constant. We truncated the Fourier series at  $N = 20$ , which provides a sufficiently accurate approximation.

### Relaxation Term

The strain contribution due to relaxation of the cellulose polymer chains is modeled by a sum of exponential functions

$$\Delta\epsilon_{relax}(t) = \sum_{i=1}^m A_{ri} \left( 1 - e^{-t/t_{ri}} \right), \quad (3)$$

where  $A_{ri}$  and  $t_{ri}$  are the amplitude and characteristic time of the  $i$ -th relaxation mode. We restrict ourselves to the cases  $m = 1$  (for the EG data in Figs. 8 and 9 and

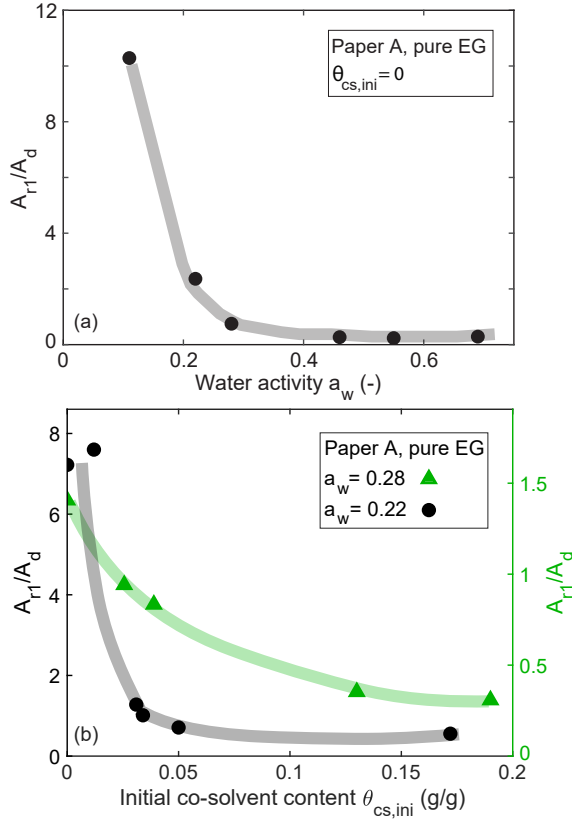

FIG. S6. Ratio of the strain amplitude factors  $A_{r1}/A_d$  after deposition of a droplet ( $V = 1 \mu\text{l}$ ) of pure EG on paper A as a function of (a) water activity  $a_w$  for  $\theta_{cs,ini} = 0$  and (b) initial EG content  $\theta_{cs,ini}$  for two values of the ambient water activity  $a_w = 0.22$  (circles) and  $0.28$  (triangles). All lines are guides to the eye.

the 60 wt% TEG data in Fig. 7 for  $a_w < 0.5$ ) and  $m = 2$  (for the 60 wt% TEG data in Fig. 7 for  $a_w > 0.5$ ).

For all cases considered in this study, we found that  $t_d < t_{r1} < t_{r2}$ , i.e. the diffusion timescale is (typically much) shorter than the relaxation timescales.

## VII. RATIO OF STRAIN AMPLITUDE FACTORS

The parameter  $A_d$  quantifies the contribution to the total strain resulting from diffusion-driven swelling, associated with the initial ingress of co-solvent and water into the paper fibers due to concentration gradients. The amplitude  $A_r$  represents the strain arising from viscoelastic relaxation, which occurs after the initial ingress of liquid that plasticizes the polymer matrix. Figure S6(a,b) presents the ratio of the strain amplitude factors  $A_{r1}/A_d$  after deposition of a droplet ( $V = 1 \mu\text{l}$ ) of pure EG on paper A as a function of water activity  $a_w$  and initial EG content  $\theta_{cs,ini}$ .

Figure S6 shows that the ratio of strain amplitudes  $A_{r1}/A_d$  decreases sharply with increasing water activity  $a_w$  and with initially present co-solvent content  $\theta_{cs,ini}$ .

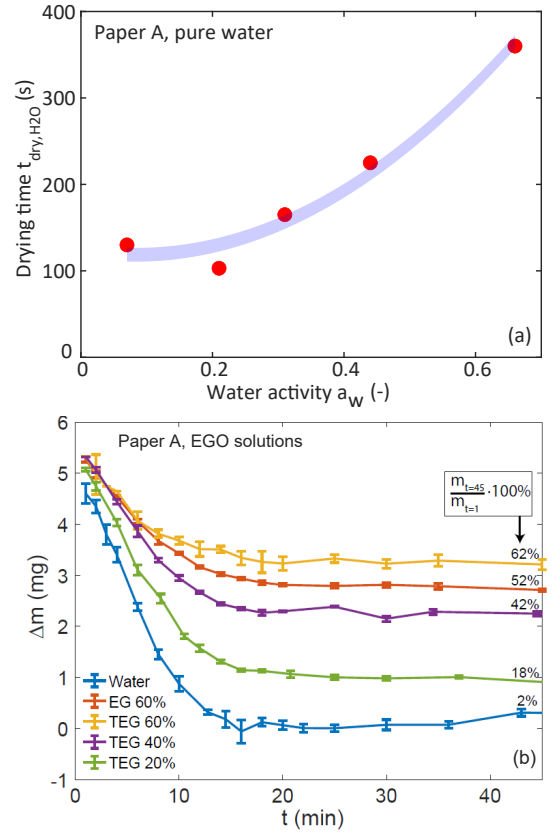

FIG. S7. (a) Drying time  $t_{dry,H2O}$  of a droplet ( $V = 1 \mu\text{l}$ ) of pure water deposited on paper A as a function of water activity  $a_w$ . The solid line is a guide to the eye. (b) Mass increment of a sheet of paper A after deposition of droplets of aqueous EGO solutions ( $V = 5 \mu\text{l}$ ) of different concentrations as a function of time ( $T = 24^\circ\text{C}$  and  $a_w = 0.3 \pm 0.05$ ). Plot reproduced from Ref. [17].

At low values of  $a_w$  or  $\theta_{cs,ini}$ , the ratio  $A_{r1}/A_d$  exceeds 1, suggesting that the response to swelling is primarily driven by internal structural relaxation of the paper matrix. In contrast, as  $a_w$  or  $\theta_{cs,ini}$  increase, the paper matrix is substantially pre-swollen (see Fig. 5) and more compliant,<sup>12–16</sup> and the strain response as a consequence of ink deposition is increasingly governed by diffusion, as reflected by the ratio  $A_{r1}/A_d$  falling below 1.

## VIII. WATER DRYING TIME AS A FUNCTION OF WATER ACTIVITY

Figure S7(a) shows the drying time  $t_{dry,H2O}$  after deposition of a droplet ( $V = 1 \mu\text{l}$ ) of pure water on paper A as a function of water activity  $a_w$ . The drying time is defined as the time at which the strain increment  $\Delta\epsilon_{TD}$  decreased to 37% of its maximum value  $\Delta\epsilon_{TD,max}$ .

Figure S7(b) shows the mass increment  $\Delta m(t)$  of a sheet of paper A after deposition of droplets of aqueous EGO solutions ( $V = 5 \mu\text{l}$ ) of different concentrations as a function of time. The drying time  $t_{dry}$  required for water

to evaporate is approximately independent of the EGO type and concentration.

## IX. MULTI-COMPONENT SOLUTIONS

### A. Pore-fiber transport of quaternary solutions

Figure S8 shows the overall characteristic swelling timescale  $t_{0.63}$  of paper A after deposition of a  $1\ \mu\text{l}$  droplet of a 60 wt% TEG solution containing 3.6 wt%  $\text{MgCl}_2$  as a function of the initial SDS concentration  $c_{\text{SDS}}$ . Measurements were taken at two different water activities  $a_w = 0.42$  and  $0.67$ . For both values of  $a_w$ ,  $t_{0.63}$  decreases with increasing SDS concentration and remains constant for  $c_{\text{SDS}} \gtrsim 2.5\ \text{wt\%}$ . The effect of relative humidity on the pore-fiber transport rate is consistent with the behavior of the ternary solutions discussed in the main manuscript.

### B. Concentration-dependence of the viscosity and surface tension of TEG solutions

Viscosity measurements were performed using a concentric-cylinder viscometer (Brookfield II+Pro), while surface tensions of the solutions were determined with a Wilhelmy plate (NIMA, PTP-10) in combination with a precision scale (Kern, ALT 220-5DAM). Experiments were conducted at a water activity of  $a_w = 0.33 \pm 0.03$  and a temperature of  $22 \pm 1^\circ\text{C}$ .

Figure S9 shows the viscosity  $\mu$  of 60 wt% TEG with  $\text{MgCl}_2$  as a function of the  $\text{MgCl}_2$  concentration  $c_{\text{MgCl}_2}$ . In this concentration range, we found that the surface tension  $\gamma$  remains essentially constant at  $51 \pm 0.2\ \text{mN/m}$ . Table S3 shows  $\gamma$  and  $\mu$  of 60 wt% TEG containing

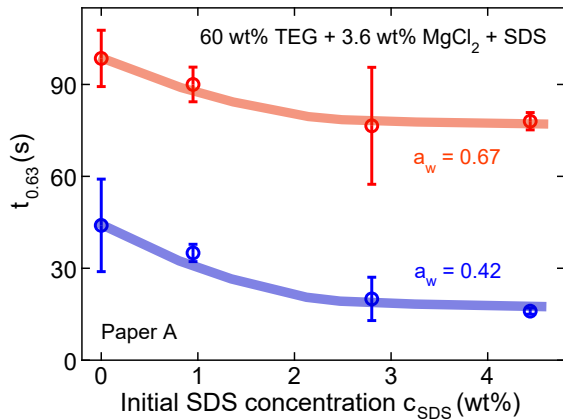

FIG. S8. Overall characteristic swelling timescale  $t_{0.63}$  of paper A after deposition of a  $1\ \mu\text{l}$  droplet of a 60 wt% TEG solution containing 3.6 wt%  $\text{MgCl}_2$  as a function of the initial SDS concentration  $c_{\text{SDS}}$ . Solid lines are guides to the eye.

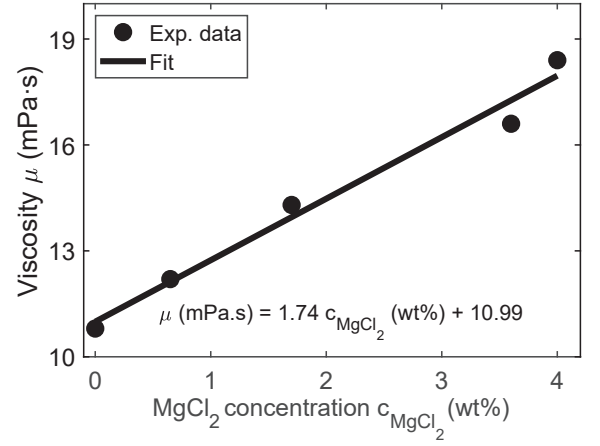

FIG. S9. Viscosity  $\mu$  of a ternary system consisting of an aqueous 60 wt% TEG solution and  $\text{MgCl}_2$  as a function of the  $\text{MgCl}_2$  concentration  $c_{\text{MgCl}_2}$ .

3.6 wt%  $\text{MgCl}_2$  and SDS as a function of the SDS concentration  $c_{\text{SDS}}$ .

TABLE S3. Surface tension  $\gamma$  and viscosity  $\mu$  of a quaternary system consisting of an aqueous 60 wt% TEG solution, 3.6 wt%  $\text{MgCl}_2$  and SDS as a function of the SDS concentration  $c_{\text{SDS}}$ .

| $c_{\text{SDS}}$ (wt%) | 0    | 0.95  | 4.44  |
|------------------------|------|-------|-------|
| $\gamma$ (mN/m)        | 51   | 37.47 | 36.64 |
| $\mu$ (mPa.s)          | 16.5 | 16.8  | 19.7  |

## REFERENCES

- U. K. Krieger, F. Siegrist, C. Marcolli, E. U. Emanuelsson, F. M. Göbel, M. Bilde, A. Marsh, J. P. Reid, A. J. Huisman, I. Riipinen, N. Hyttinen, N. Myllys, T. Kurtén, T. Bannan, C. J. Percival and D. Topping, *Atmos. Meas. Tech.*, 2018, **11**, 49–63.
- S. P. Verevkin, D. H. Zaitsau, V. N. Emel'yanenko and A. A. Zhabina, *Fluid Phase Equilibria*, 2015, **397**, 87–94.
- The Dow Chemical Company, *Tetraethylene Glycol Product Information*, <https://www.dow.com>, 2003, Technical data sheet.
- MEGlobal, *Monoethylene Glycol Product Guide*, <https://www.meglobal.biz>, 2008, Technical brochure.
- L. Ninni, M. S. Camargo and A. J. A. Meirelles, *Thermochim. Acta*, 1999, **328**, 169–176.
- M. Herskowitz and M. Gottlieb, *J. Chem. Eng. Data*, 1984, **29**, 173–175.
- MonoEthylene Glycol product guide*, MEGlobal, 2008.
- C. A. S. Hill, A. Norton and G. Newman, *J. Appl. Polym. Sci.*, 2009, **112**, 1524–1537.
- M. Chen, B. Coasne, R. Guyer, D. Derome and J. Carmeliet, *Nat. commun.*, 2018, **9**, 3507.
- A. Berens and H. Hopfenberg, *Polymer*, 1978, **19**, 489–496.
- J. Crank, *The Mathematics of Diffusion*, Oxford University Press, 1975.
- K. C. Yeh, J. M. Considine and J. C. Suhling, *Proc. Tappi Int. Pap. Phys. Conf. (Kona, Hawaii)*, 1991, 695–711.
- M. Lee, S. Kim, H.-Y. Kim and L. Mahadevan, *Phys. Fluids*, 2016, **28**, 042101.

- <sup>14</sup>J.-W. Rhim, *Food Sci. Biotechnol.*, 2010, **19**, 243–247.
- <sup>15</sup>B. Lin, J. Auernhammer, J.-L. Schäfer, T. Meckel, R. Stark, M. Biesalski and B.-X. Xu, *Cellulose*, 2022, **29**, 1129–1148.
- <sup>16</sup>W. J. Cousins, *Wood Sci. Technol.*, 1978, **12**, 161–167.
- <sup>17</sup>M. G. Wijburg, *Transport and Evaporation of Aqueous Co-solvent Solutions in Thin Porous Media*, MSc thesis, Eindhoven University of Technology, 2022.
